# Supplementary material for: Mitochondrial genome sequences reveal deep divergences among Anopheles punctulatus sibling species in Papua New Guinea
Source: PubMed Central journal article supplement (PMC3577438; doi:10.1186/1475-2875-12-64), 2013-02-14

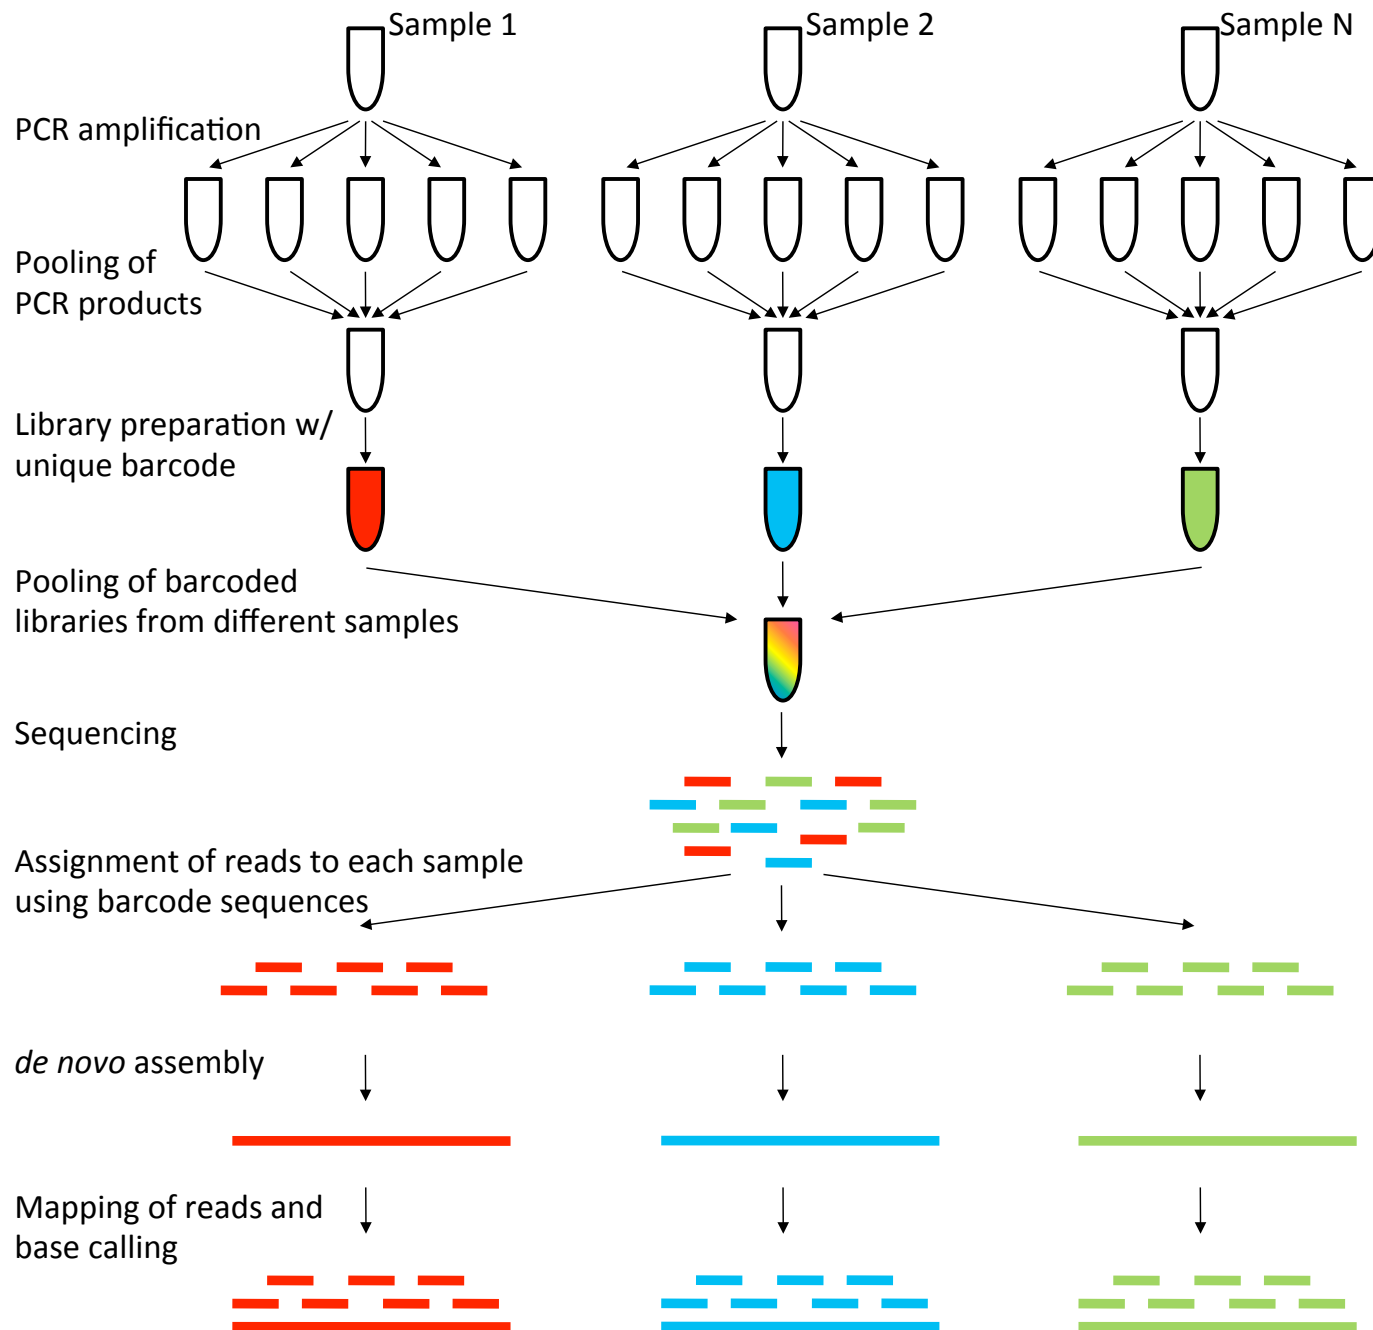

Supplement: 1475-2875-12-64-S4.pdf [file 1475-2875-12-64-S4.pdf]
